# Supplementary material for: Hindered rotor benchmarks for the transition states of free radical additions to unsaturated hydrocarbons
Source: Royal Society of Chemistry journal article supplement (doi:10.1039/d0cp04194g), 2020-01-01
Supplement: d0cp04194g1.pdf [file d0cp04194g1.pdf]

**Supplemental Material**  
**to**  
**Hindered Rotor Benchmarks for the Transition States of Free Radical Additions**  
**to Unsaturated Hydrocarbons**

Yanjin Sun,<sup>1\*</sup> Kieran P. Somers,<sup>1</sup> Quan-De Wang,<sup>1,2</sup> Caoimhe Farrell,<sup>1</sup> Henry J. Curran<sup>1\*</sup>

<sup>1</sup> Combustion Chemistry Centre, School of Chemistry, Ryan Institute, MaREI, National University of Ireland,  
Galway, Ireland

<sup>2</sup> Low Carbon Energy Institute and School of Chemical Engineering, Jiangsu Province Engineering Laboratory  
of High Efficient Energy Storage Technology and Equipment, China University of Mining and Technology,  
Xuzhou, 221008, People's Republic of China

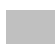

\* Corresponding author: [y.sun5@nuigalway.ie](mailto:y.sun5@nuigalway.ie),

[henry.curran@nuigalway.ie](mailto:henry.curran@nuigalway.ie)

1. The bond lengths of the newly formed rotors for the TSs of  $\dot{\text{C}}\text{H}_3$ ,  $\dot{\text{C}}_2\text{H}_3$ ,  $\dot{\text{C}}_2\text{H}_5$ ,  $\text{CH}_3\dot{\text{O}}$  radical additions to  $\text{C}_2\text{H}_2$ , which are calculated at CCSD(T)-F12/cc-pVDZ-F12 and twelve DFT methods.

**Table S1** The bond lengths of the newly formed rotors for the TSs of  $\dot{\text{C}}\text{H}_3$ ,  $\dot{\text{C}}_2\text{H}_3$ ,  $\dot{\text{C}}_2\text{H}_5$ ,  $\text{CH}_3\dot{\text{O}}$  radical additions to  $\text{C}_2\text{H}_2$ .

| Label | $\dot{\text{R}}$             | CCSD(T)-<br>F12 | B2PLYP-D3       |                 |                   | B3LYP       |                 |                   | M06-2X      |                 |                   | $\omega$ B97X-D |                 |                   |
|-------|------------------------------|-----------------|-----------------|-----------------|-------------------|-------------|-----------------|-------------------|-------------|-----------------|-------------------|-----------------|-----------------|-------------------|
|       |                              |                 | cc-pVDZ-<br>F12 | 6-<br>31+G(d,p) | 6-<br>311++G(d,p) | cc-<br>pVTZ | 6-<br>31+G(d,p) | 6-<br>311++G(d,p) | cc-<br>pVTZ | 6-<br>31+G(d,p) | 6-<br>311++G(d,p) | cc-<br>pVTZ     | 6-<br>31+G(d,p) | 6-<br>311++G(d,p) |
| TS1   | $\dot{\text{C}}\text{H}_3$   | 2.24            | 2.26            | 2.23            | 2.23              | 2.34        | 2.30            | 2.30              | 2.24        | 2.22            | 2.22              | 2.29            | 2.26            | 2.26              |
| TS9   | $\dot{\text{C}}_2\text{H}_3$ | 2.28            | 2.30            | 2.27            | 2.27              | 2.40        | 2.33            | 2.34              | 2.28        | 2.26            | 2.25              | 2.32            | 2.29            | 2.29              |
| TS17  | $\dot{\text{C}}_2\text{H}_5$ | 2.24            | 2.25            | 2.23            | 2.23              | 2.33        | 2.29            | 2.29              | 2.23        | 2.21            | 2.21              | 2.28            | 2.25            | 2.25              |
| TS25  | $\text{CH}_3\dot{\text{O}}$  | 1.98            | 1.98            | 1.96            | 1.97              | 2.02        | 1.99            | 2.00              | 1.97        | 1.95            | 1.96              | 2.00            | 1.97            | 1.98              |

2. The dihedrals of the newly formed rotors for the TSs of  $\dot{\text{C}}\text{H}_3$ ,  $\dot{\text{C}}_2\text{H}_3$ ,  $\dot{\text{C}}_2\text{H}_5$ ,  $\text{CH}_3\dot{\text{O}}$  radical additions to  $\text{C}_2\text{H}_2$ , which are calculated at CCSD(T)-F12/cc-pVDZ-F12 and twelve DFT methods.

**Table S2** The dihedrals of the newly formed rotors for the TSs of  $\dot{\text{C}}\text{H}_3$ ,  $\dot{\text{C}}_2\text{H}_3$ ,  $\dot{\text{C}}_2\text{H}_5$ ,  $\text{CH}_3\dot{\text{O}}$  radical additions to  $\text{C}_2\text{H}_2$ .

| Label | $\dot{\text{R}}$             | CCSD(T)-<br>F12 | B2PLYP-D3       |                 |                   | B3LYP       |                 |                   | M06-2X      |                 |                       | $\omega$ B97X-D |                 |                   |
|-------|------------------------------|-----------------|-----------------|-----------------|-------------------|-------------|-----------------|-------------------|-------------|-----------------|-----------------------|-----------------|-----------------|-------------------|
|       |                              |                 | cc-pVDZ-<br>F12 | 6-<br>31+G(d,p) | 6-<br>311++G(d,p) | cc-<br>pVTZ | 6-<br>31+G(d,p) | 6-<br>311++G(d,p) | cc-<br>pVTZ | 6-<br>31+G(d,p) | 6-<br>311++G(d,<br>p) | cc-<br>pVTZ     | 6-<br>31+G(d,p) | 6-<br>311++G(d,p) |
| TS1   | $\dot{\text{C}}\text{H}_3$   | -0.96           | 0.00            | 0.00            | 0.00              | 0.00        | 0.00            | 0.00              | 0.00        | 0.00            | 0.00                  | 0.00            | 0.00            | 0.00              |
| TS9   | $\dot{\text{C}}_2\text{H}_3$ | 47.07           | 64.60           | 64.68           | 53.44             | -180.00     | 80.03           | 72.09             | 47.30       | -169.83         | -42.00                | 60.33           | 59.35           | 54.98             |
| TS17  | $\dot{\text{C}}_2\text{H}_5$ | 0.86            | 0.00            | 0.00            | 0.00              | 0.00        | 0.00            | 0.00              | 0.00        | 0.00            | 0.00                  | 0.00            | 0.00            | 0.00              |
| TS25  | $\text{CH}_3\dot{\text{O}}$  | 1.94            | 0.00            | 0.00            | 0.00              | 0.00        | 0.00            | 0.00              | 0.00        | 0.00            | 0.00                  | 0.00            | 0.00            | 0.00              |

3. The T1 diagnostic values of the CCSD(T)/cc-pVQZ calculations for the TSs of  $\dot{\text{C}}\text{H}_3$ ,  $\dot{\text{C}}_2\text{H}_3$ ,  $\dot{\text{C}}_2\text{H}_5$ ,  $\text{CH}_3\dot{\text{O}}$  radical additions to  $\text{C}_2\text{H}_2$  and  $\text{C}_2\text{H}_4$ .

**Table S3** T1 diagnostic values of the CCSD(T)/cc-pVQZ calculations

| Reactant               |                              | T1 diagnostic   |
|------------------------|------------------------------|-----------------|
| A                      | B                            | CCSD(T)/cc-pVQZ |
| $\text{C}_2\text{H}_2$ | $\dot{\text{C}}\text{H}_3$   | 0.0383          |
| $\text{C}_2\text{H}_4$ |                              | 0.0302          |
| $\text{C}_2\text{H}_2$ | $\dot{\text{C}}_2\text{H}_3$ | 0.0446          |
| $\text{C}_2\text{H}_4$ |                              | 0.0398          |
| $\text{C}_2\text{H}_2$ | $\dot{\text{C}}_2\text{H}_5$ | 0.0336          |
| $\text{C}_2\text{H}_4$ |                              | 0.0271          |
| $\text{C}_2\text{H}_2$ | $\text{CH}_3\dot{\text{O}}$  | 0.0344          |
| $\text{C}_2\text{H}_4$ |                              | 0.0311          |

4. **Table S4** The maximum differences of the hindered barriers calculated by twelve DFT methods for the newly formed internal rotors in target reactions. ( $\text{kJ mol}^{-1}$ )

| Label                                                   | React. B                           | $\Delta E_{\text{HR}}^{\text{max}}$ | Label | React. B                           | $\Delta E_{\text{HR}}^{\text{max}}$ |
|---------------------------------------------------------|------------------------------------|-------------------------------------|-------|------------------------------------|-------------------------------------|
| <b><math>\dot{\text{C}}\text{H}_3</math> addition</b>   |                                    |                                     |       |                                    |                                     |
| TS1                                                     | $\text{C}_2\text{H}_2$             | 0.30                                | TS2   | $\text{C}_2\text{H}_4$             | 0.79                                |
| TS3                                                     | $\text{C}_3\text{H}_4\text{-a(E)}$ | 0.53                                | TS4   | $\text{C}_3\text{H}_4\text{-a(I)}$ | 0.49                                |
| TS5                                                     | $\text{C}_3\text{H}_4\text{-p(E)}$ | 0.39                                | TS6   | $\text{C}_3\text{H}_4\text{-p(I)}$ | 0.67                                |
| TS7                                                     | $\text{C}_3\text{H}_6\text{(E)}$   | 0.84                                | TS8   | $\text{C}_3\text{H}_6\text{(I)}$   | 1.30                                |
| <b><math>\dot{\text{C}}_2\text{H}_3</math> addition</b> |                                    |                                     |       |                                    |                                     |
| TS9                                                     | $\text{C}_2\text{H}_2$             | 1.10                                | TS10  | $\text{C}_2\text{H}_4$             | 1.91                                |
| TS11                                                    | $\text{C}_3\text{H}_4\text{-a(E)}$ | 2.21                                | TS12  | $\text{C}_3\text{H}_4\text{-a(I)}$ | 2.30                                |
| TS13                                                    | $\text{C}_3\text{H}_4\text{-p(E)}$ | 1.55                                | TS14  | $\text{C}_3\text{H}_4\text{-p(I)}$ | 1.24                                |
| TS15                                                    | $\text{C}_3\text{H}_6\text{(E)}$   | 2.65                                | TS16  | $\text{C}_3\text{H}_6\text{(I)}$   | 2.01                                |
| <b><math>\dot{\text{C}}_2\text{H}_5</math> addition</b> |                                    |                                     |       |                                    |                                     |
| TS17                                                    | $\text{C}_2\text{H}_2$             | 2.42                                | TS18  | $\text{C}_2\text{H}_4$             | 2.36                                |
| TS19                                                    | $\text{C}_3\text{H}_4\text{-a(E)}$ | 1.98                                | TS20  | $\text{C}_3\text{H}_4\text{-a(I)}$ | 1.41                                |
| TS21                                                    | $\text{C}_3\text{H}_4\text{-p(E)}$ | 3.02                                | TS22  | $\text{C}_3\text{H}_4\text{-p(I)}$ | 3.16                                |
| TS23                                                    | $\text{C}_3\text{H}_6\text{(E)}$   | 2.71                                | TS24  | $\text{C}_3\text{H}_6\text{(I)}$   | 2.31                                |
| <b><math>\text{CH}_3\dot{\text{O}}</math> addition</b>  |                                    |                                     |       |                                    |                                     |
| TS25                                                    | $\text{C}_2\text{H}_2$             | 4.40                                | TS26  | $\text{C}_2\text{H}_4$             | 2.38                                |
| TS27                                                    | $\text{C}_3\text{H}_4\text{-a(E)}$ | 3.56                                | TS28  | $\text{C}_3\text{H}_4\text{-a(I)}$ | 5.78                                |
| TS29                                                    | $\text{C}_3\text{H}_4\text{-p(E)}$ | 6.73                                | TS30  | $\text{C}_3\text{H}_4\text{-p(I)}$ | 4.62                                |
| TS31                                                    | $\text{C}_3\text{H}_6\text{(E)}$   | 4.39                                | TS32  | $\text{C}_3\text{H}_6\text{(I)}$   | 3.43                                |

5. **Table S5** The maximum differences of rotational constants calculated by twelve DFT methods for the newly formed internal rotors in target reactions. ( $\text{cm}^{-1}$ )

| Label                                                   | Reac. <i>B</i>                     | $\Delta B(\chi)_{\text{max}}$ | Label | Reac. <i>B</i>                     | $\Delta B(\chi)_{\text{max}}$ |
|---------------------------------------------------------|------------------------------------|-------------------------------|-------|------------------------------------|-------------------------------|
| <b><math>\dot{\text{C}}\text{H}_3</math> addition</b>   |                                    |                               |       |                                    |                               |
| TS1                                                     | $\text{C}_2\text{H}_2$             | 0.13                          | TS2   | $\text{C}_2\text{H}_4$             | 0.09                          |
| TS3                                                     | $\text{C}_3\text{H}_4\text{-a(E)}$ | 0.12                          | TS4   | $\text{C}_3\text{H}_4\text{-a(I)}$ | 0.07                          |
| TS5                                                     | $\text{C}_3\text{H}_4\text{-p(E)}$ | 0.14                          | TS6   | $\text{C}_3\text{H}_4\text{-p(I)}$ | 0.08                          |
| TS7                                                     | $\text{C}_3\text{H}_6\text{(E)}$   | 0.13                          | TS8   | $\text{C}_3\text{H}_6\text{(I)}$   | 0.08                          |
| <b><math>\dot{\text{C}}_2\text{H}_3</math> addition</b> |                                    |                               |       |                                    |                               |
| TS9                                                     | $\text{C}_2\text{H}_2$             | 0.18                          | TS10  | $\text{C}_2\text{H}_4$             | 0.09                          |
| TS11                                                    | $\text{C}_3\text{H}_4\text{-a(E)}$ | 0.12                          | TS12  | $\text{C}_3\text{H}_4\text{-a(I)}$ | 0.13                          |
| TS13                                                    | $\text{C}_3\text{H}_4\text{-p(E)}$ | 0.14                          | TS14  | $\text{C}_3\text{H}_4\text{-p(I)}$ | 0.10                          |
| TS15                                                    | $\text{C}_3\text{H}_6\text{(E)}$   | 0.20                          | TS16  | $\text{C}_3\text{H}_6\text{(I)}$   | 0.11                          |
| <b><math>\dot{\text{C}}_2\text{H}_5</math> addition</b> |                                    |                               |       |                                    |                               |
| TS17                                                    | $\text{C}_2\text{H}_2$             | 0.14                          | TS18  | $\text{C}_2\text{H}_4$             | 0.06                          |
| TS19                                                    | $\text{C}_3\text{H}_4\text{-a(E)}$ | 0.09                          | TS20  | $\text{C}_3\text{H}_4\text{-a(I)}$ | 0.05                          |
| TS21                                                    | $\text{C}_3\text{H}_4\text{-p(E)}$ | 0.04                          | TS22  | $\text{C}_3\text{H}_4\text{-p(I)}$ | 0.04                          |
| TS23                                                    | $\text{C}_3\text{H}_6\text{(E)}$   | 0.13                          | TS24  | $\text{C}_3\text{H}_6\text{(I)}$   | 0.04                          |
| <b><math>\text{CH}_3\dot{\text{O}}</math> addition</b>  |                                    |                               |       |                                    |                               |
| TS25                                                    | $\text{C}_2\text{H}_2$             | 0.15                          | TS26  | $\text{C}_2\text{H}_4$             | 0.19                          |
| TS27                                                    | $\text{C}_3\text{H}_4\text{-a(E)}$ | 0.17                          | TS28  | $\text{C}_3\text{H}_4\text{-a(I)}$ | 0.30                          |
| TS29                                                    | $\text{C}_3\text{H}_4\text{-p(E)}$ | 0.08                          | TS30  | $\text{C}_3\text{H}_4\text{-p(I)}$ | 0.07                          |
| TS31                                                    | $\text{C}_3\text{H}_6\text{(E)}$   | 0.25                          | TS32  | $\text{C}_3\text{H}_6\text{(I)}$   | 0.11                          |

6. **Table S6** The maximum percentage errors of  $Q_{\text{HR}}$  as a function of temperature calculated by twelve DFT methods for the newly formed internal rotors in target reactions. (in percentage)

| Label                                                   | Reac. <i>B</i>                      | $\frac{Q_{\text{HR}}^{\text{DFT max}} - Q_{\text{HR}}^{\text{DFT min}}}{Q_{\text{HR}}^{\text{DFT min}}}$ | Label | Reac. <i>B</i>                      | $\frac{Q_{\text{HR}}^{\text{DFT max}} - Q_{\text{HR}}^{\text{DFT min}}}{Q_{\text{HR}}^{\text{DFT min}}}$ |
|---------------------------------------------------------|-------------------------------------|----------------------------------------------------------------------------------------------------------|-------|-------------------------------------|----------------------------------------------------------------------------------------------------------|
| <b><math>\dot{\text{C}}\text{H}_3</math> addition</b>   |                                     |                                                                                                          |       |                                     |                                                                                                          |
| TS1                                                     | C <sub>2</sub> H <sub>2</sub>       | 2.81                                                                                                     | TS2   | C <sub>2</sub> H <sub>4</sub>       | 8.43                                                                                                     |
| TS3                                                     | C <sub>3</sub> H <sub>4</sub> -a(E) | 5.49                                                                                                     | TS4   | C <sub>3</sub> H <sub>4</sub> -a(I) | 6.05                                                                                                     |
| TS5                                                     | C <sub>3</sub> H <sub>4</sub> -p(E) | 4.11                                                                                                     | TS6   | C <sub>3</sub> H <sub>4</sub> -p(I) | 7.32                                                                                                     |
| TS7                                                     | C <sub>3</sub> H <sub>6</sub> (E)   | 9.31                                                                                                     | TS8   | C <sub>3</sub> H <sub>6</sub> (I)   | 12.64                                                                                                    |
| <b><math>\dot{\text{C}}_2\text{H}_3</math> addition</b> |                                     |                                                                                                          |       |                                     |                                                                                                          |
| TS9                                                     | C <sub>2</sub> H <sub>2</sub>       | 15.79                                                                                                    | TS10  | C <sub>2</sub> H <sub>4</sub>       | 62.43                                                                                                    |
| TS11                                                    | C <sub>3</sub> H <sub>4</sub> -a(E) | 51.75                                                                                                    | TS12  | C <sub>3</sub> H <sub>4</sub> -a(I) | 32.78                                                                                                    |
| TS13                                                    | C <sub>3</sub> H <sub>4</sub> -p(E) | 17.04                                                                                                    | TS14  | C <sub>3</sub> H <sub>4</sub> -p(I) | 22.68                                                                                                    |
| TS15                                                    | C <sub>3</sub> H <sub>6</sub> (E)   | 87.08                                                                                                    | TS16  | C <sub>3</sub> H <sub>6</sub> (I)   | 49.61                                                                                                    |
| <b><math>\dot{\text{C}}_2\text{H}_5</math> addition</b> |                                     |                                                                                                          |       |                                     |                                                                                                          |
| TS17                                                    | C <sub>2</sub> H <sub>2</sub>       | 77.85                                                                                                    | TS18  | C <sub>2</sub> H <sub>4</sub>       | 31.44                                                                                                    |
| TS19                                                    | C <sub>3</sub> H <sub>4</sub> -a(E) | 20.27                                                                                                    | TS20  | C <sub>3</sub> H <sub>4</sub> -a(I) | 37.56                                                                                                    |
| TS21                                                    | C <sub>3</sub> H <sub>4</sub> -p(E) | 123.54                                                                                                   | TS22  | C <sub>3</sub> H <sub>4</sub> -p(I) | 49.74                                                                                                    |
| TS23                                                    | C <sub>3</sub> H <sub>6</sub> (E)   | 21.81                                                                                                    | TS24  | C <sub>3</sub> H <sub>6</sub> (I)   | 16.84                                                                                                    |
| <b><math>\text{CH}_3\dot{\text{O}}</math> addition</b>  |                                     |                                                                                                          |       |                                     |                                                                                                          |
| TS25                                                    | C <sub>2</sub> H <sub>2</sub>       | 30.4                                                                                                     | TS26  | C <sub>2</sub> H <sub>4</sub>       | 9.16                                                                                                     |
| TS27                                                    | C <sub>3</sub> H <sub>4</sub> -a(E) | 11.06                                                                                                    | TS28  | C <sub>3</sub> H <sub>4</sub> -a(I) | 17.55                                                                                                    |
| TS29                                                    | C <sub>3</sub> H <sub>4</sub> -p(E) | 77.30                                                                                                    | TS30  | C <sub>3</sub> H <sub>4</sub> -p(I) | 42.83                                                                                                    |
| TS31                                                    | C <sub>3</sub> H <sub>6</sub> (E)   | 41.33                                                                                                    | TS32  | C <sub>3</sub> H <sub>6</sub> (I)   | 35.47                                                                                                    |

7. Rotational constants for the newly formed rotors of  $\dot{\text{C}}\text{H}_3/\dot{\text{C}}_2\text{H}_3/\dot{\text{C}}_2\text{H}_5/\text{CH}_3\dot{\text{O}}$  radical additions to  $\text{C}_2\text{H}_2/\text{C}_2\text{H}_4/\text{C}_3\text{H}_4\text{-a}/\text{C}_3\text{H}_4\text{-p}/\text{C}_3\text{H}_6$  calculated at twelve DFT methods.

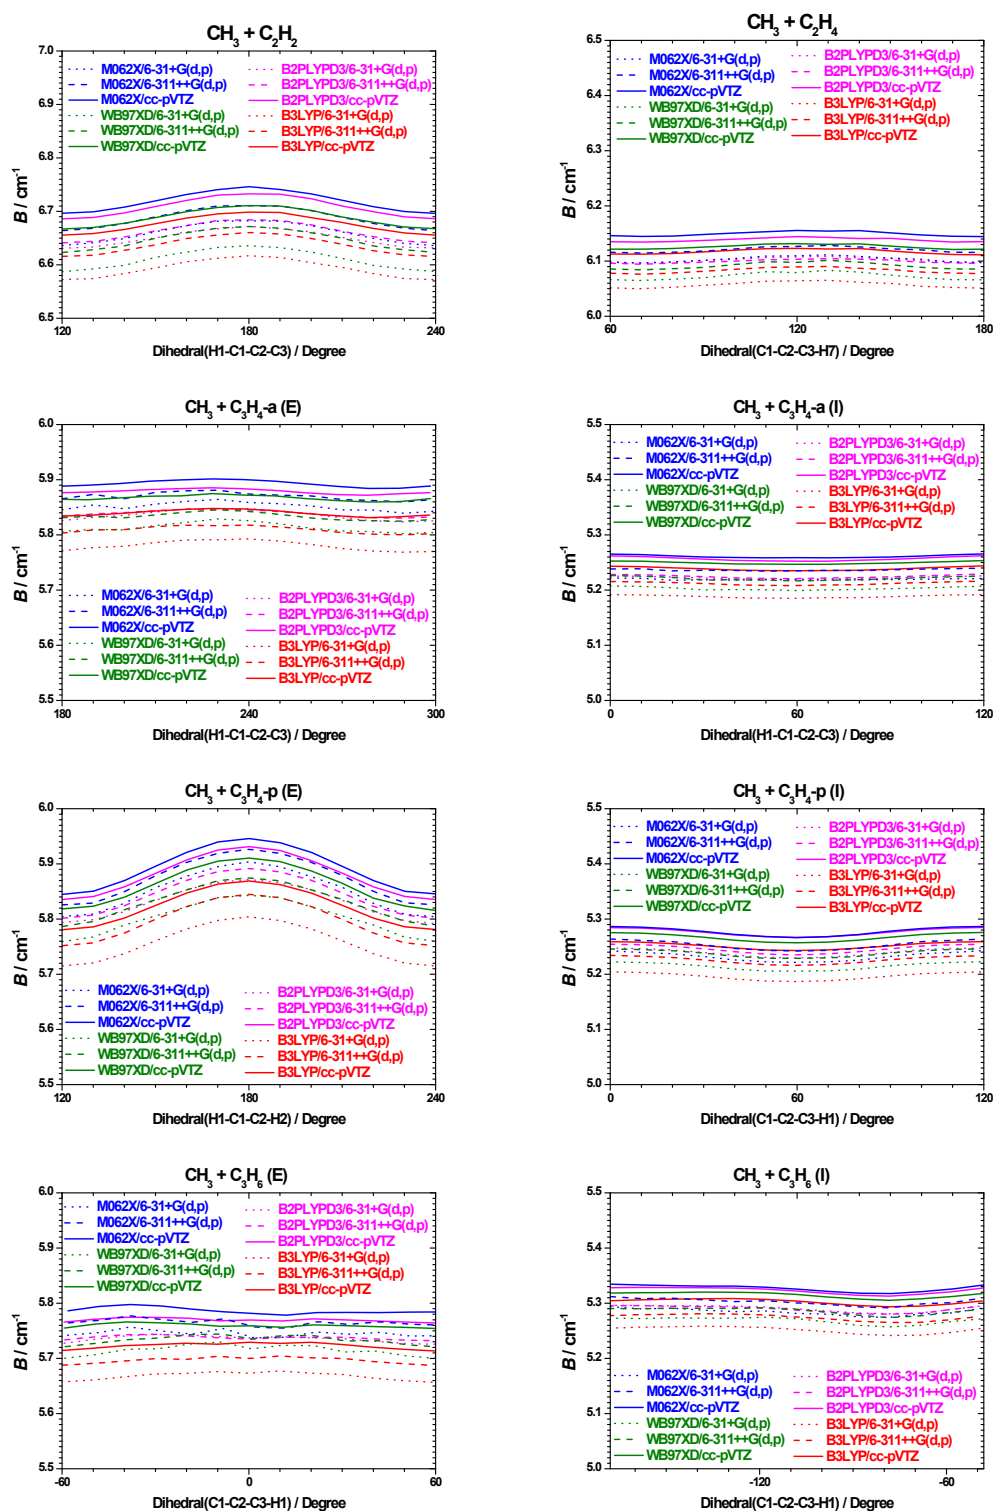

**Fig. S1** Rotational constants for the newly formed methyl rotors of  $\dot{\text{C}}\text{H}_3$  radical additions to  $\text{C}_2\text{H}_2/\text{C}_2\text{H}_4/\text{C}_3\text{H}_4\text{-a}/\text{C}_3\text{H}_4\text{-p}/\text{C}_3\text{H}_6$  calculated at twelve DFT methods.

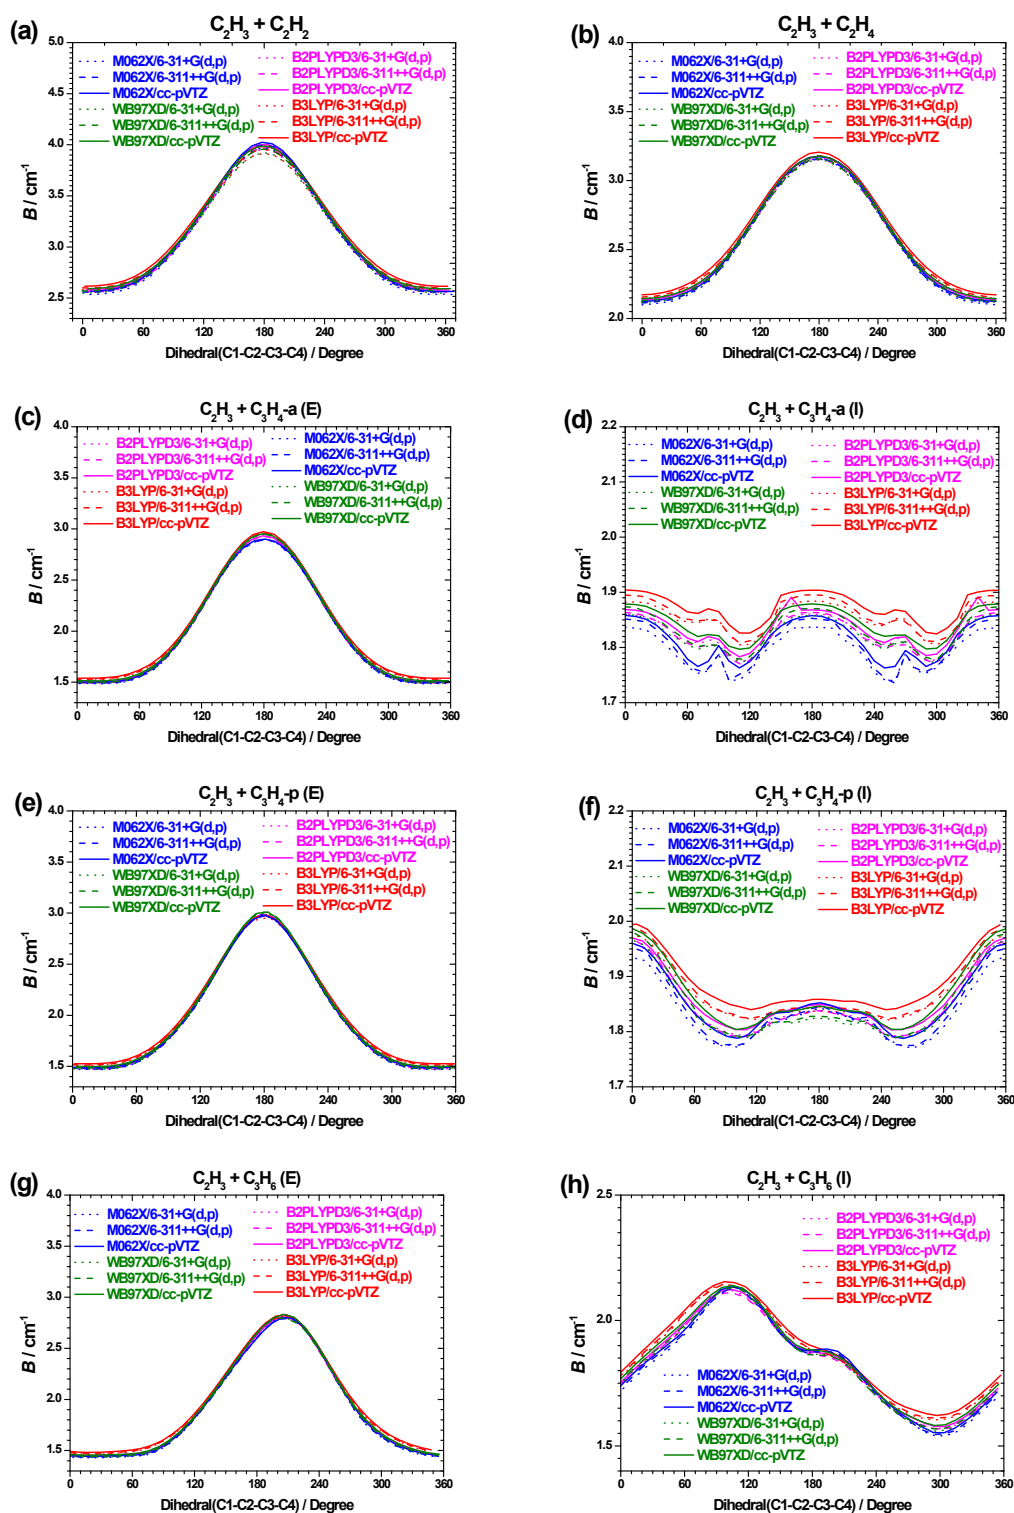

**Fig. S2** Rotational constants for rotors formed by  $\dot{C}_2H_3$  radical additions to  $C_2H_2/C_2H_4/C_3H_4\text{-a}/C_3H_4\text{-p}/C_3H_6$  calculated at twelve DFT methods.

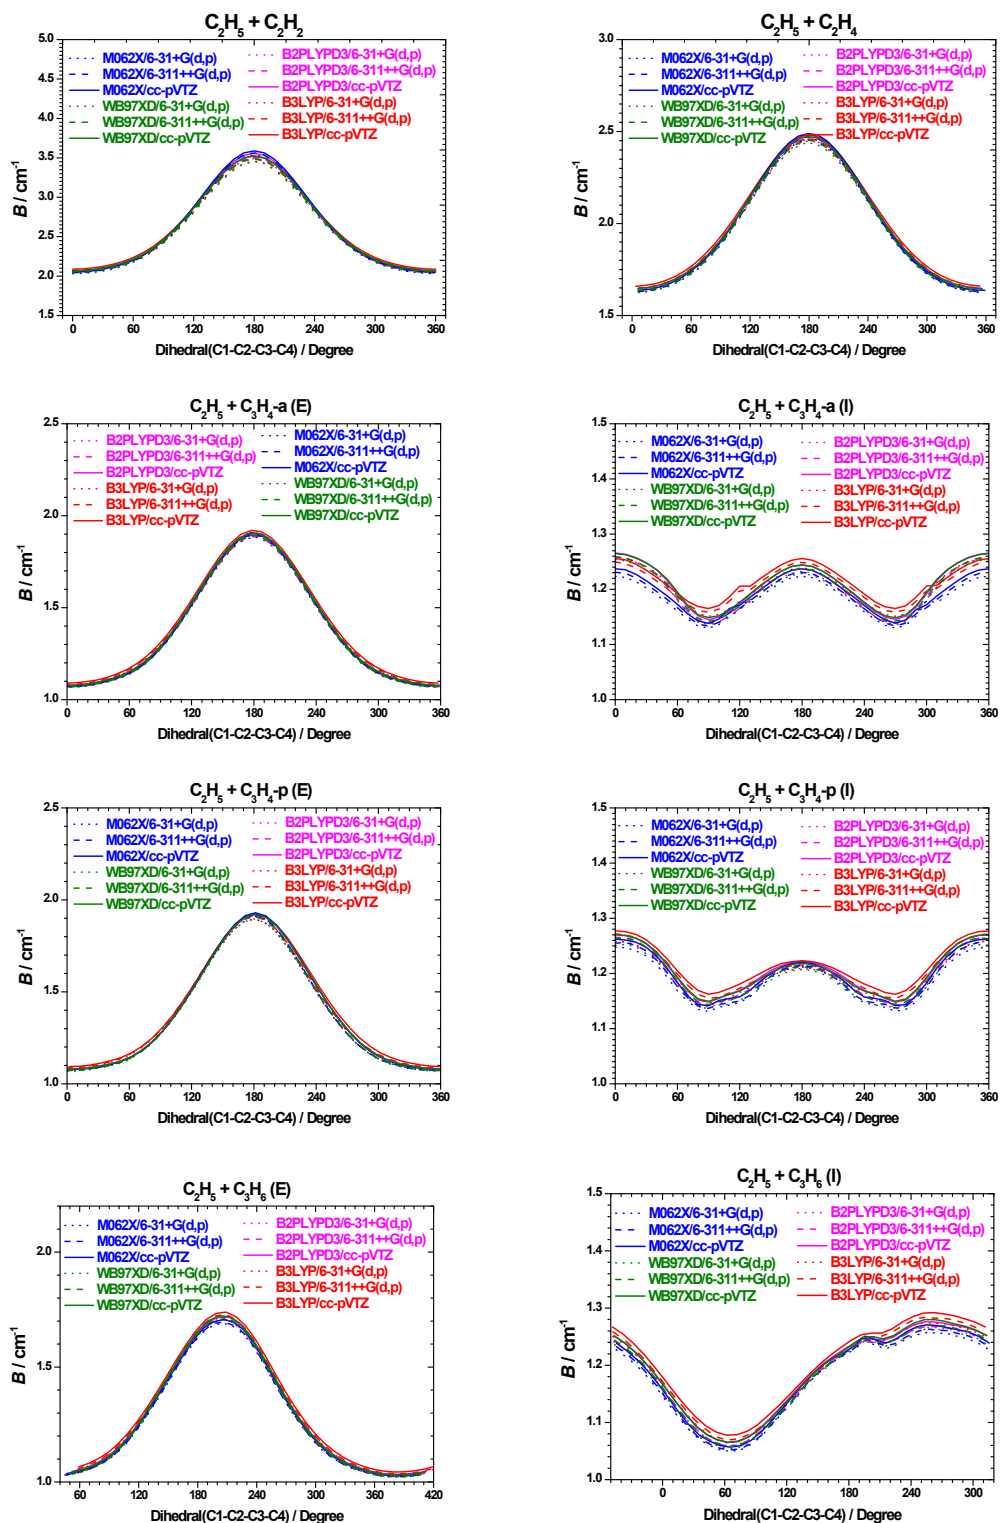

**Fig. S3** Rotational constants for rotors formed by  $\dot{\text{C}}_2\text{H}_5$  radical additions to  $\text{C}_2\text{H}_2/\text{C}_2\text{H}_4/\text{C}_3\text{H}_4\text{-a}/\text{C}_3\text{H}_4\text{-p}/\text{C}_3\text{H}_6$  calculated at twelve DFT methods.



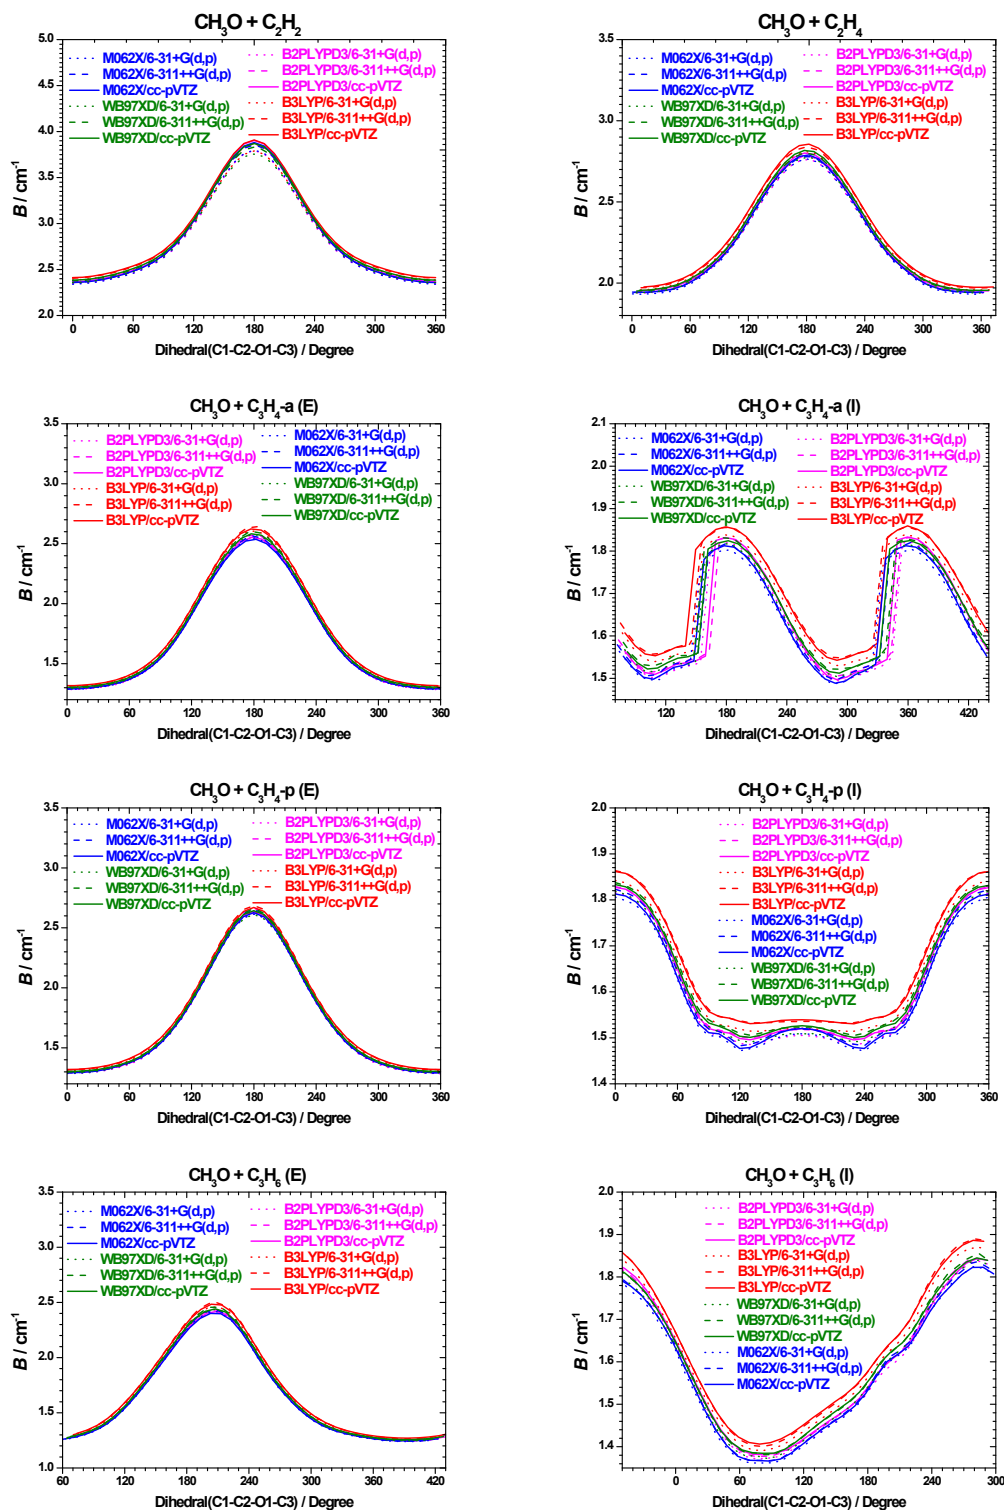

**Fig. S4** Rotational constants for rotors formed by  $\text{CH}_3\dot{\text{O}}$  radical additions to  $\text{C}_2\text{H}_2/\text{C}_2\text{H}_4/\text{C}_3\text{H}_4\text{-a}/\text{C}_3\text{H}_4\text{-p}/\text{C}_3\text{H}_6$  calculated at twelve DFT methods.

8. Hindrance potentials for the newly formed rotors of  $\dot{\text{C}}\text{H}_3/\dot{\text{C}}_2\text{H}_3/\dot{\text{C}}_2\text{H}_5/\text{CH}_3\dot{\text{O}}$  radical additions to  $\text{C}_2\text{H}_2/\text{C}_2\text{H}_4/\text{C}_3\text{H}_4\text{-a}/\text{C}_3\text{H}_4\text{-p}/\text{C}_3\text{H}_6$  calculated at twelve DFT methods.

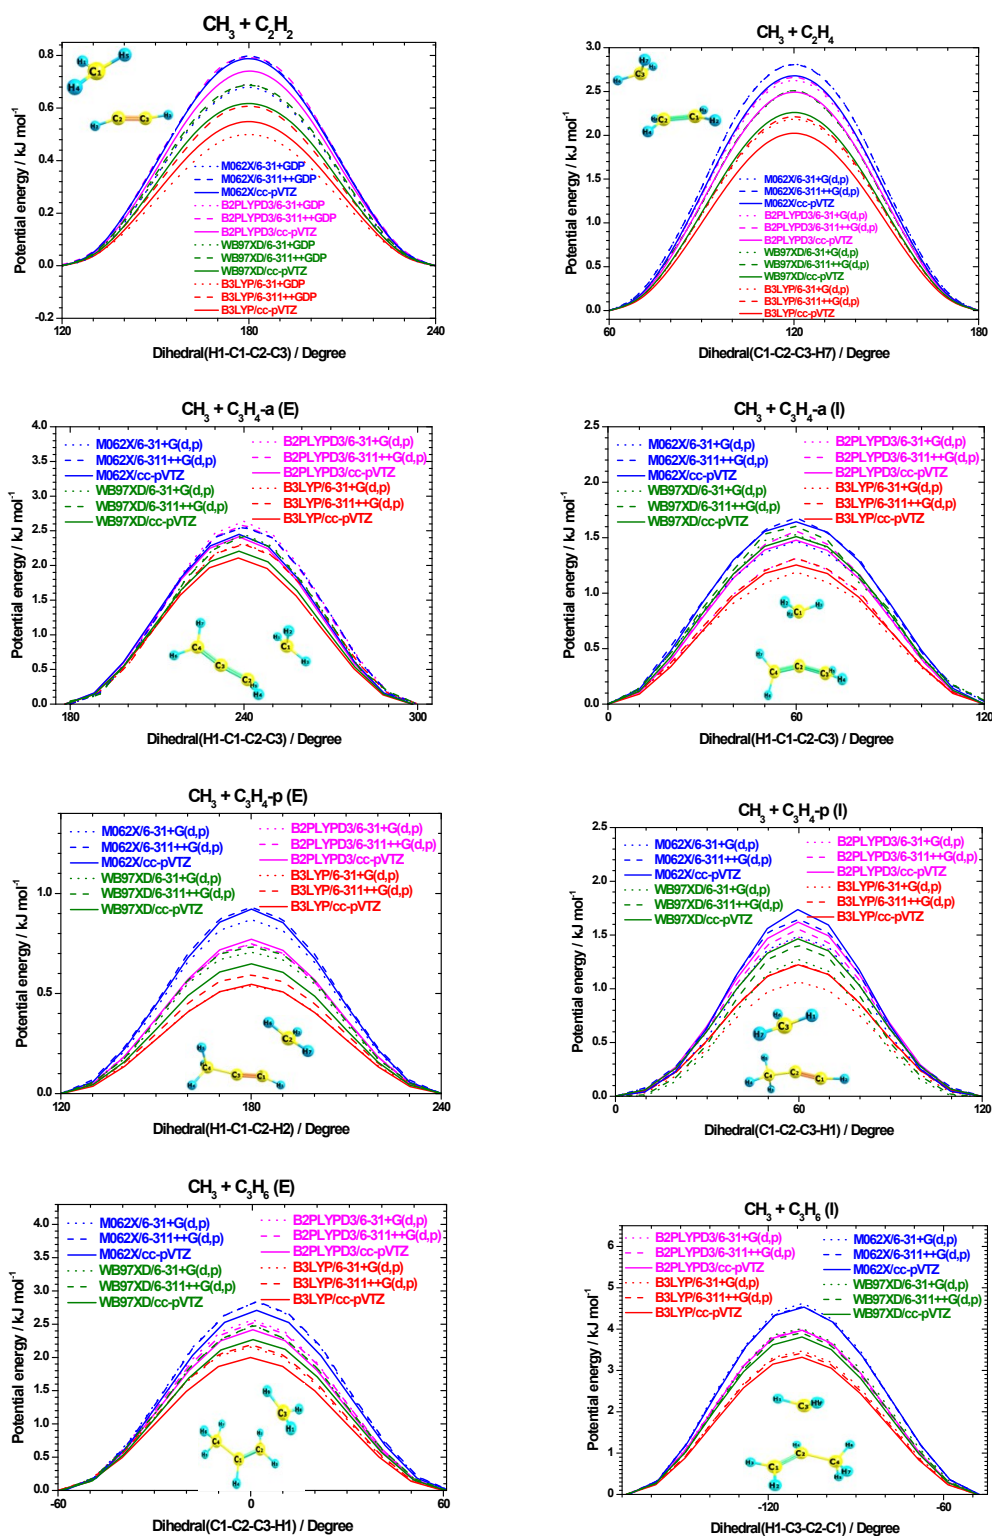

**Fig. S5** Hindrance potentials for the newly formed methyl rotors of  $\dot{\text{C}}\text{H}_3$  radical additions to  $\text{C}_2\text{H}_2/\text{C}_2\text{H}_4/\text{C}_3\text{H}_4\text{-a}/\text{C}_3\text{H}_4\text{-p}/\text{C}_3\text{H}_6$  calculated at twelve DFT methods.

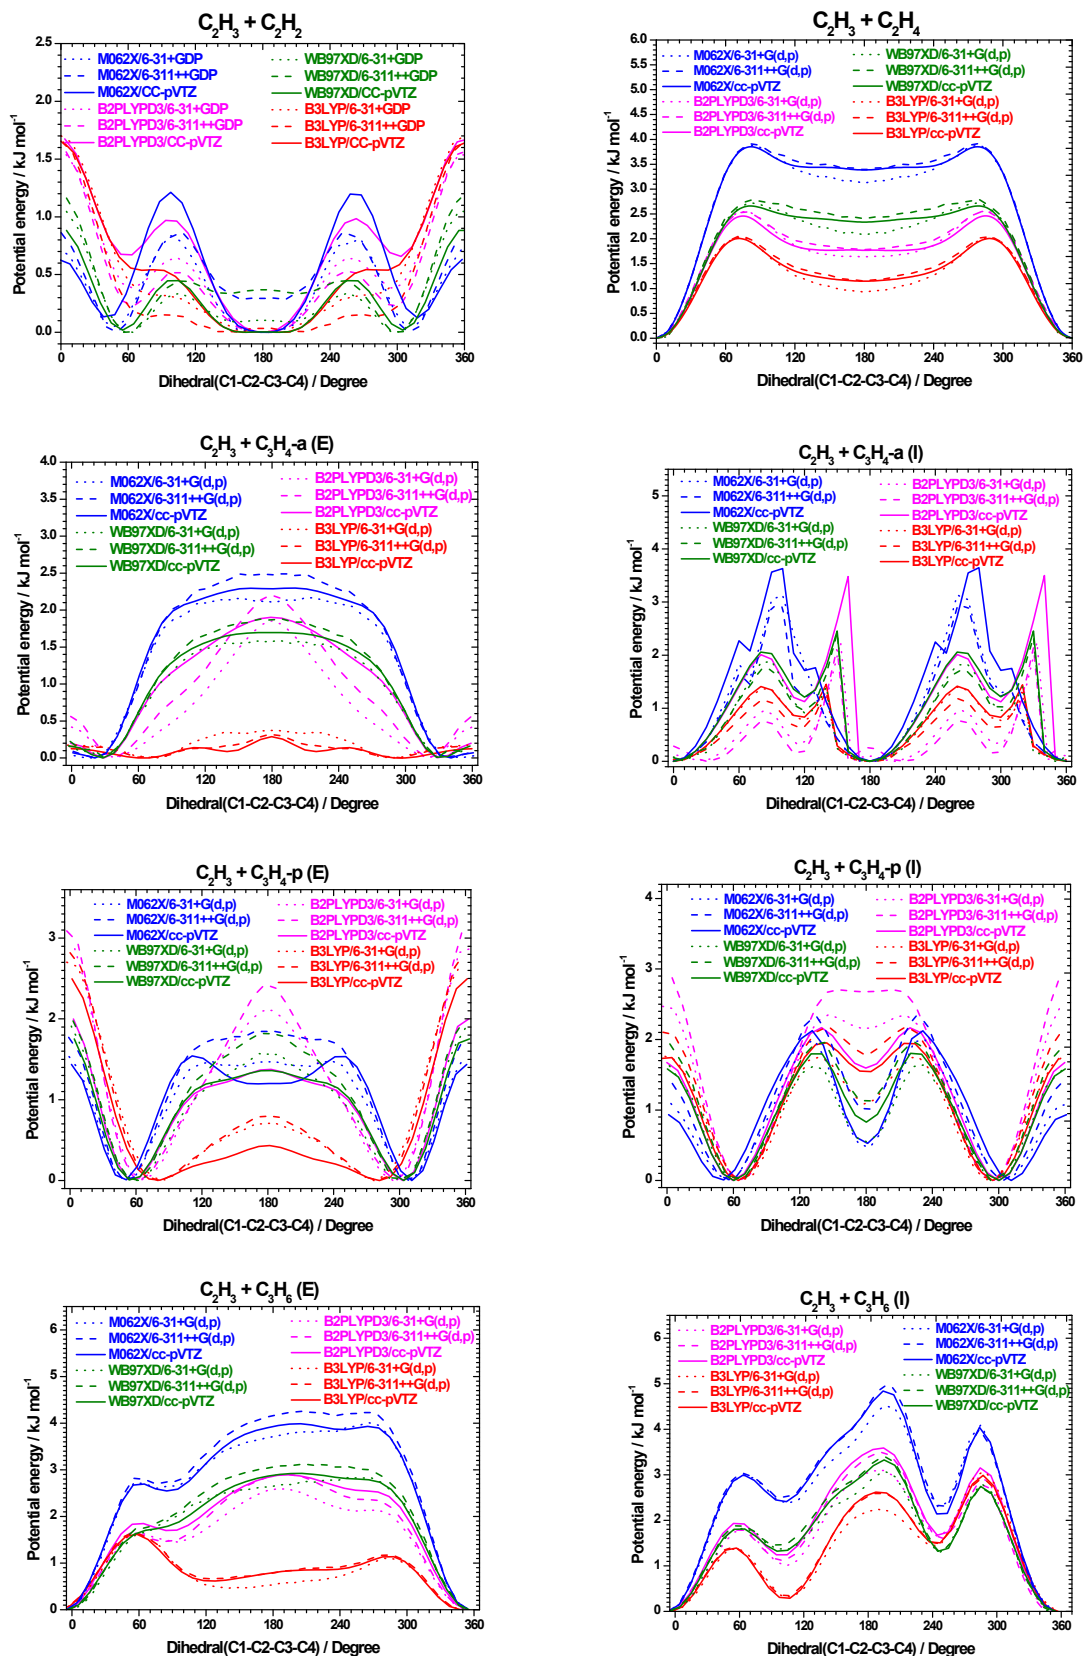

**Fig. S6** Hindrance potentials for the newly formed methyl rotors of  $\dot{C}_2H_3$  radical additions to  $C_2H_2/C_2H_4/C_3H_4\text{-a}/C_3H_4\text{-p}/C_3H_6$  calculated at twelve DFT methods.

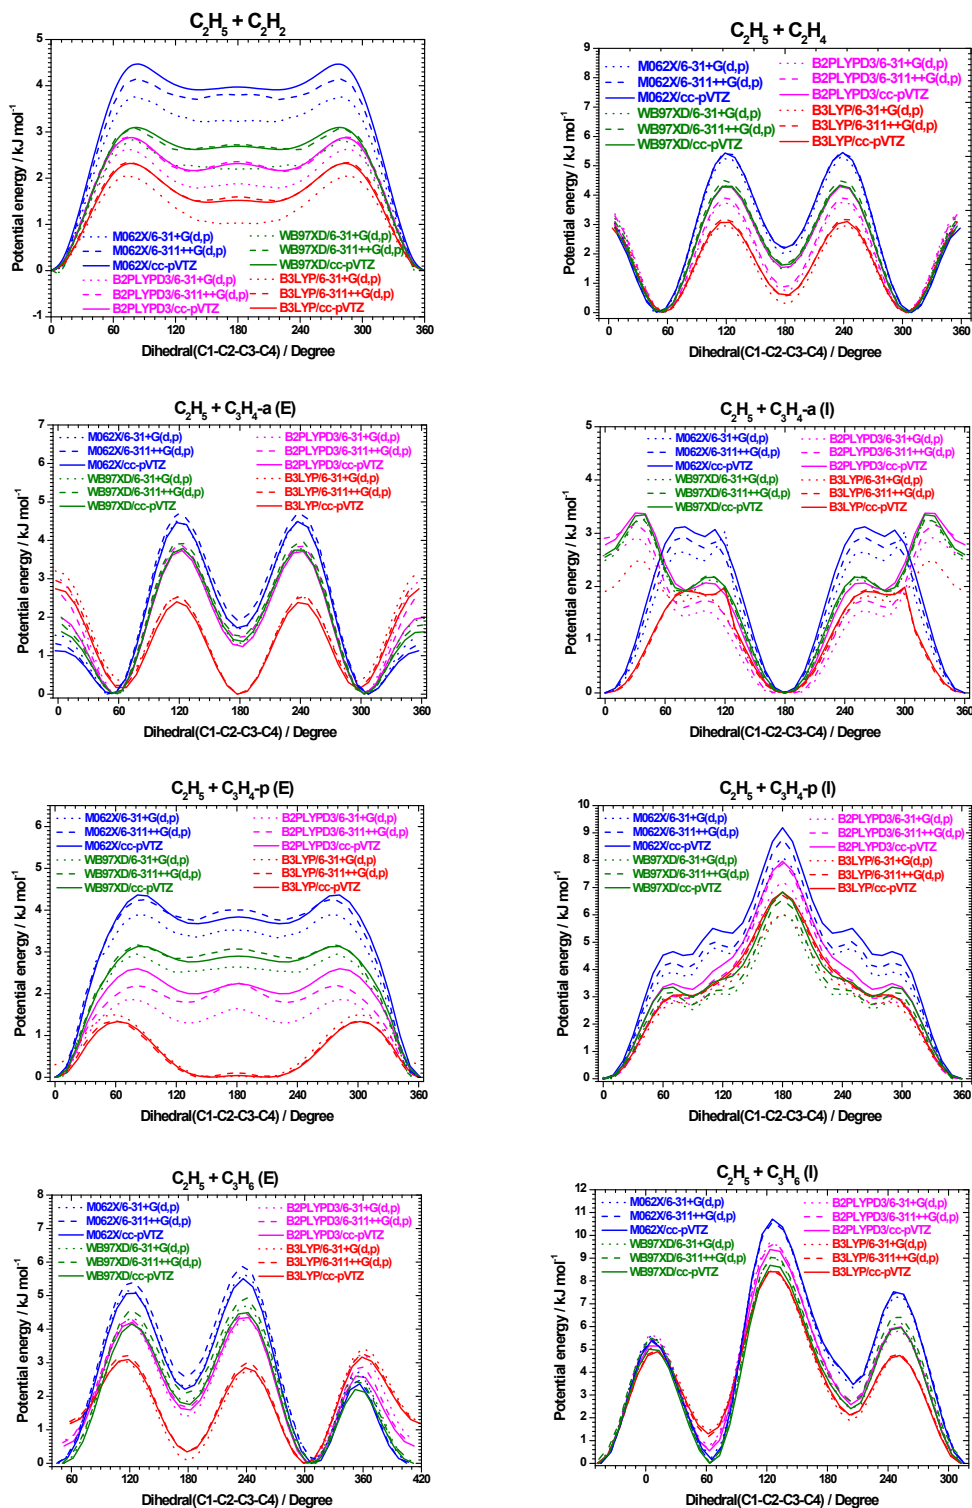

**Fig. S7** Hindrance potentials for the newly formed methyl rotors of  $\dot{\text{C}}_2\text{H}_5$  radical additions to  $\text{C}_2\text{H}_2/\text{C}_2\text{H}_4/\text{C}_3\text{H}_4\text{-a}/\text{C}_3\text{H}_4\text{-p}/\text{C}_3\text{H}_6$  calculated at twelve DFT methods.

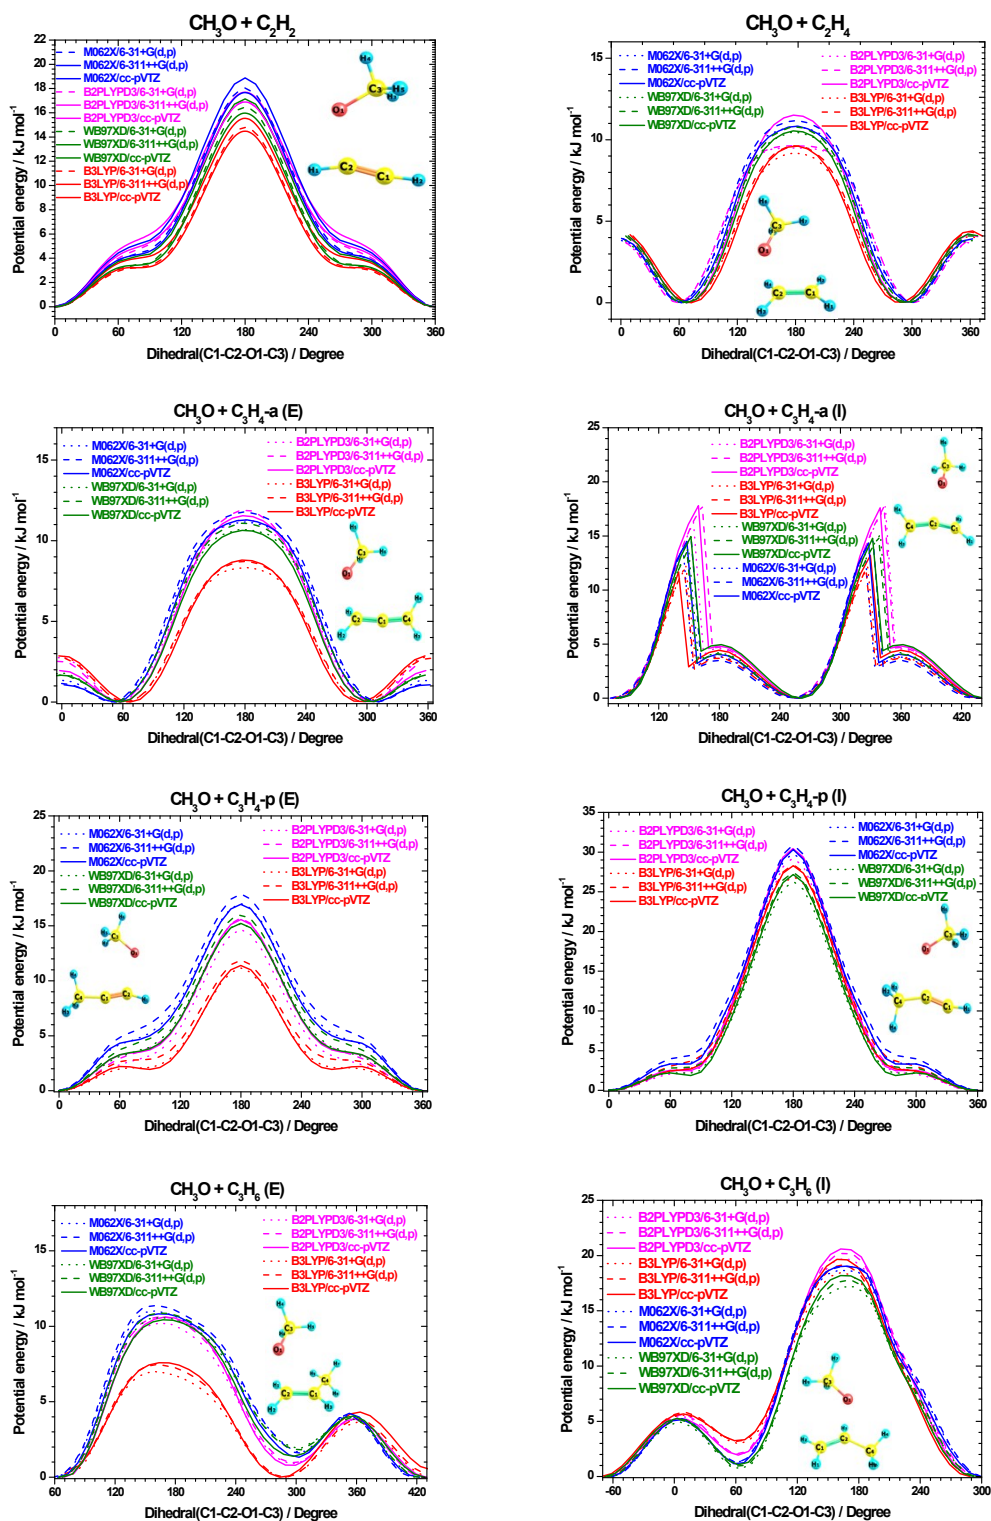

**Fig. S8** Hindrance potentials for the newly formed methyl rotors of  $\text{CH}_3\dot{\text{O}}$  radical additions to  $\text{C}_2\text{H}_2/\text{C}_2\text{H}_4/\text{C}_3\text{H}_4\text{-a}/\text{C}_3\text{H}_4\text{-p}/\text{C}_3\text{H}_6$  calculated at twelve DFT methods.

9. The relative energy deviations between DFT and DLPNO-CCSD(T)/CBS results for the newly formed rotors of  $\dot{\text{C}}\text{H}_3/\dot{\text{C}}_2\text{H}_3/\dot{\text{C}}_2\text{H}_5/\text{CH}_3\dot{\text{O}}$  radical additions to  $\text{C}_2\text{H}_2/\text{C}_2\text{H}_4$ .

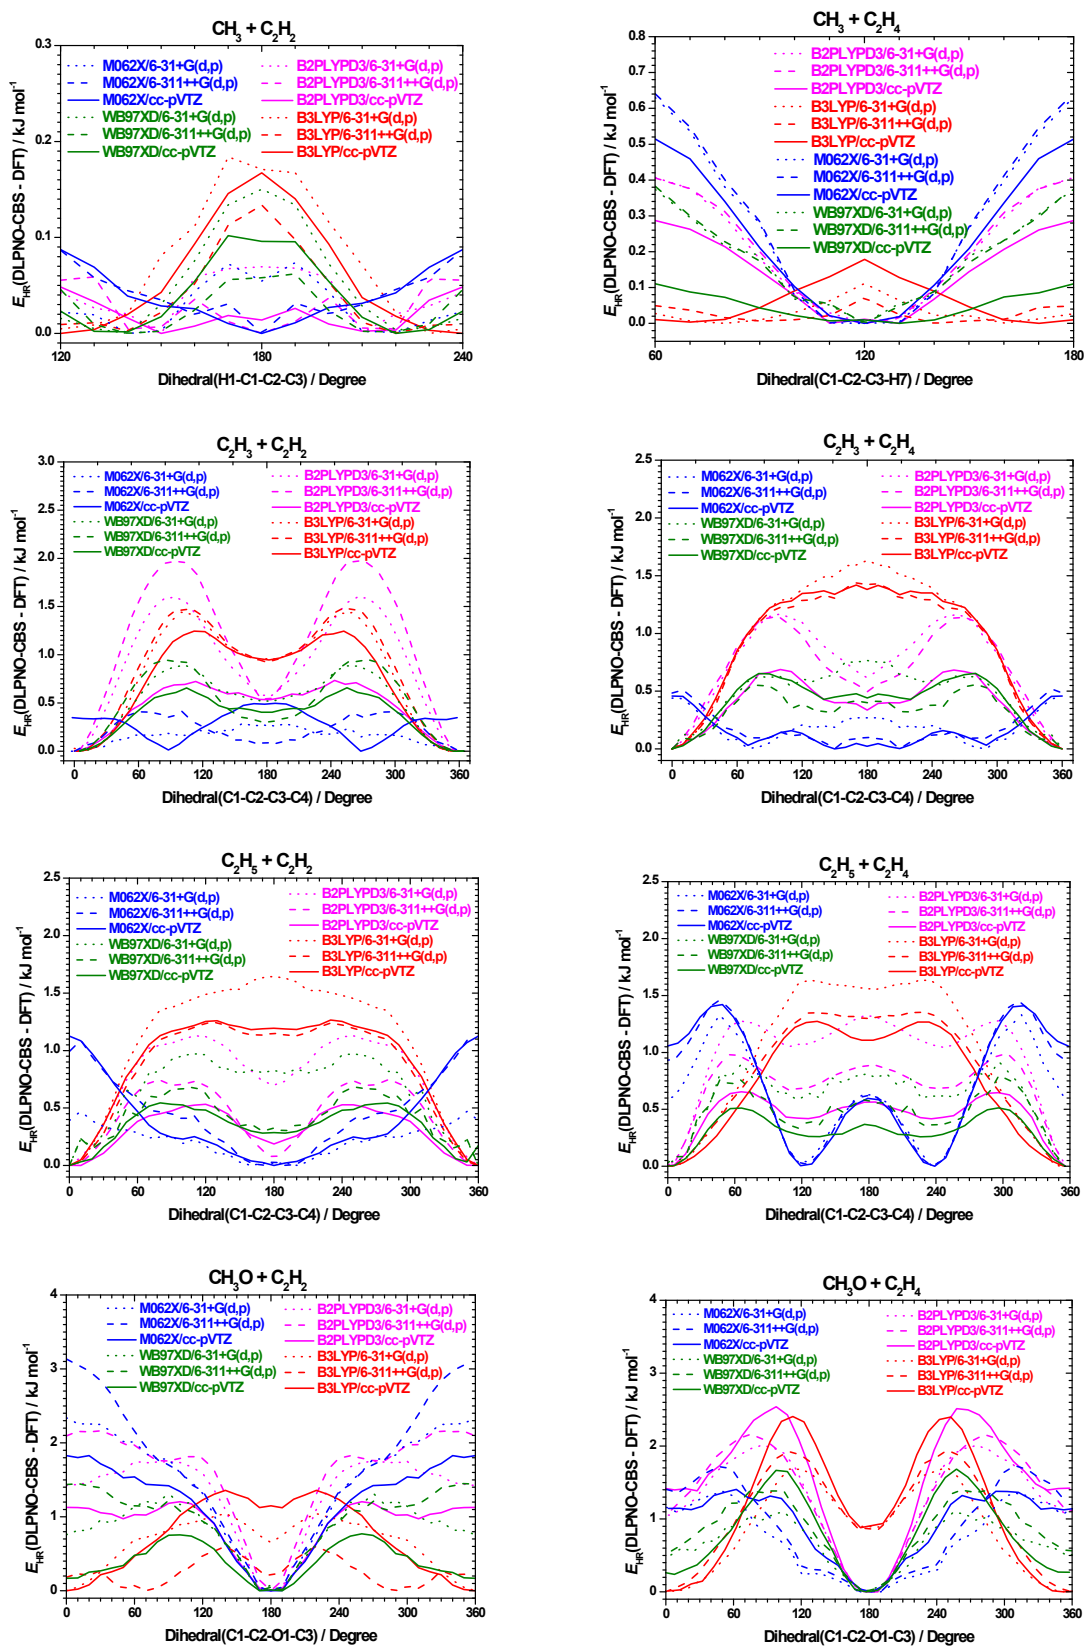

**Fig. S9** The relative potential energy differences calculated by DFT and DLPNO-CCSD(T)/CBS methods for rotors formed by  $\dot{\text{C}}\text{H}_3/\dot{\text{C}}_2\text{H}_3/\dot{\text{C}}_2\text{H}_5/\text{CH}_3\dot{\text{O}}$  radical additions to  $\text{C}_2\text{H}_2$  and  $\text{C}_2\text{H}_4$ , and potential energy differences are relative to the lowest energy difference of each hindrance potential.

10. The percentage deviations between DFT and the corresponding mean energies for rotors formed by  $\dot{\text{C}}\text{H}_3/\dot{\text{C}}_2\text{H}_3/\dot{\text{C}}_2\text{H}_5/\text{CH}_3\dot{\text{O}}$  radical additions to  $\text{C}_2\text{H}_2/\text{C}_2\text{H}_4$  at 500 K, 1000 K and 2000 K.

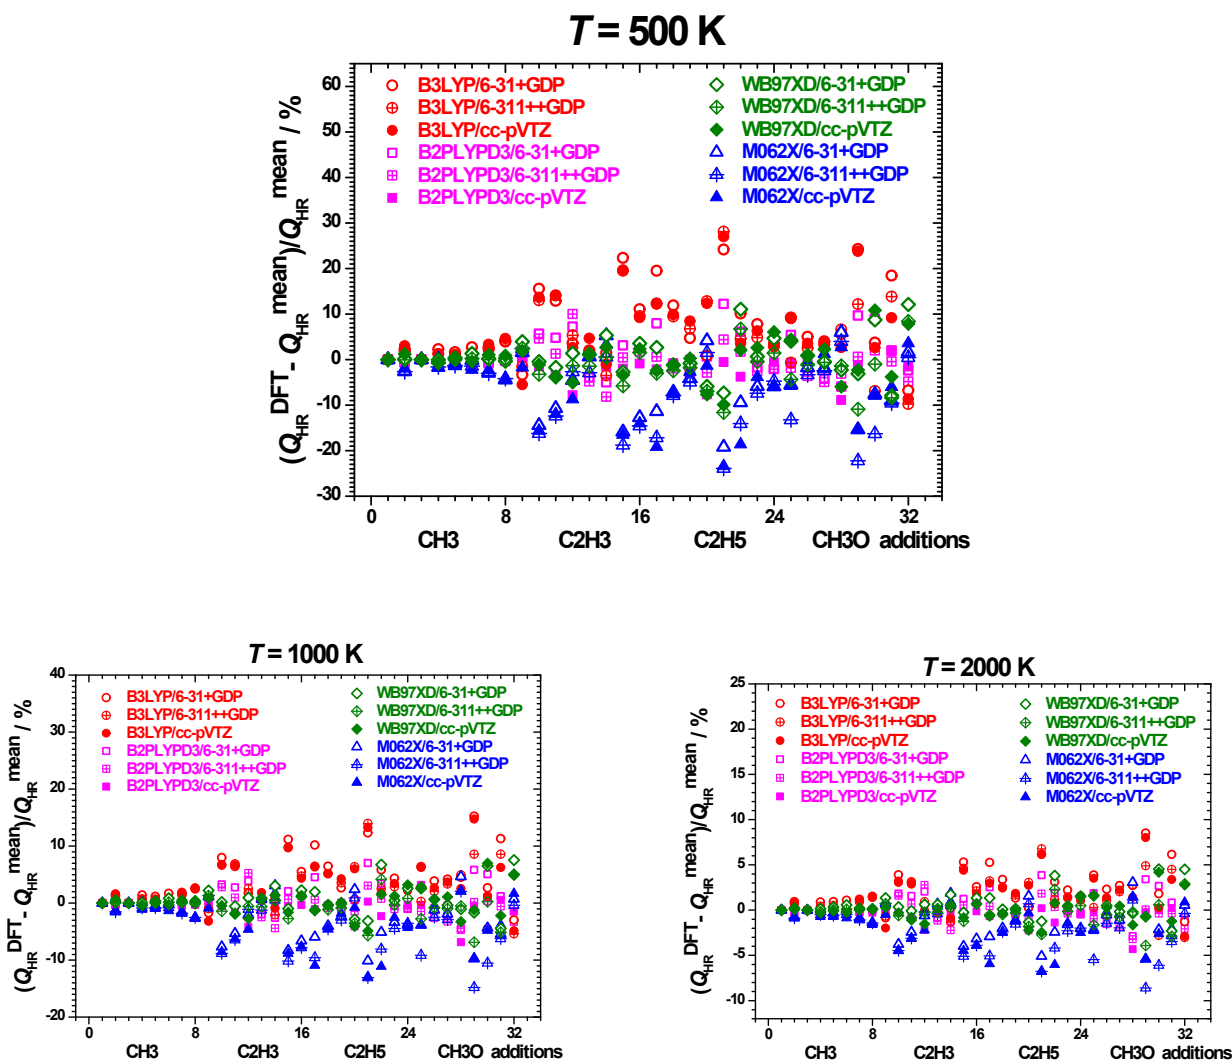

**Fig. S10** The percentage deviations between DFT and the corresponding mean energies for rotors formed by  $\dot{\text{C}}\text{H}_3/\dot{\text{C}}_2\text{H}_3/\dot{\text{C}}_2\text{H}_5/\text{CH}_3\dot{\text{O}}$  radical additions to  $\text{C}_2\text{H}_2/\text{C}_2\text{H}_4$  at 500 K, 1000 K and 2000 K.

11. The maximum  $E_{\text{HR}}$ (DLPNO-CCSD(T)/CBS – DFT) for rotors formed through  $\dot{\text{C}}\text{H}_3/\dot{\text{C}}_2\text{H}_3/\dot{\text{C}}_2\text{H}_5/\text{CH}_3\dot{\text{O}}$  radical additions to  $\text{C}_2\text{H}_2/\text{C}_2\text{H}_4$ .

**Table S7** The maximum deviations of hindrance potential energies between DFT and DLPNO-CCSD(T) methods for rotors formed through  $\dot{\text{C}}\text{H}_3/\dot{\text{C}}_2\text{H}_3/\dot{\text{C}}_2\text{H}_5/\text{CH}_3\dot{\text{O}}$  radical additions to  $\text{C}_2\text{H}_2/\text{C}_2\text{H}_4$ .

| $\Delta E_{\text{HR}}(\text{MAX})$ | B2PLYP-D3       |                   |             | B3LYP           |                   |             | M06-2X          |                   |             | $\omega$ B97X-D |                   |             |
|------------------------------------|-----------------|-------------------|-------------|-----------------|-------------------|-------------|-----------------|-------------------|-------------|-----------------|-------------------|-------------|
|                                    | 6-<br>31+G(d,p) | 6-<br>311++G(d,p) | cc-<br>pVTZ |
| TS1                                | 0.07            | 0.06              | 0.05        | 0.18            | 0.13              | 0.17        | 0.07            | 0.09              | 0.09        | 0.15            | 0.06              | 0.10        |
| TS2                                | 0.41            | 0.41              | 0.29        | 0.11            | 0.07              | 0.18        | 0.63            | 0.64              | 0.51        | 0.37            | 0.38              | 0.11        |
| TS9                                | 1.60            | 1.97              | 0.73        | 1.44            | 1.48              | 1.25        | 0.29            | 0.42              | 0.50        | 0.88            | 0.95              | 0.66        |
| TS10                               | 1.17            | 1.14              | 0.69        | 1.63            | 1.44              | 1.42        | 0.44            | 0.52              | 0.46        | 0.76            | 0.56              | 0.65        |
| TS17                               | 1.13            | 0.74              | 0.53        | 1.64            | 1.24              | 1.27        | 0.47            | 1.09              | 1.13        | 0.97            | 0.68              | 0.54        |
| TS18                               | 1.33            | 0.99              | 0.65        | 1.64            | 1.35              | 1.27        | 1.33            | 1.46              | 1.42        | 0.92            | 0.80              | 0.51        |
| TS25                               | 1.75            | 2.16              | 1.20        | 1.04            | 0.60              | 1.36        | 2.34            | 3.13              | 1.83        | 1.32            | 1.45              | 0.77        |
| TS26                               | 2.01            | 2.16              | 2.54        | 1.71            | 1.94              | 2.41        | 1.38            | 1.73              | 1.41        | 1.10            | 1.39              | 1.68        |



12. The maximum deviations of hindered internal rotation partition function between DFT and DLPNO-CCSD(T) methods for rotors formed through  $\dot{\text{C}}\text{H}_3/\dot{\text{C}}_2\text{H}_3/\dot{\text{C}}_2\text{H}_5/\text{CH}_3\dot{\text{O}}$  radical additions to  $\text{C}_2\text{H}_2/\text{C}_2\text{H}_4$ .

**Table S8** The maximum deviations of  $Q_{\text{HR}}$  between DFT and DLPNO-CCSD(T) methods for rotors formed through  $\dot{\text{C}}\text{H}_3/\dot{\text{C}}_2\text{H}_3/\dot{\text{C}}_2\text{H}_5/\text{CH}_3\dot{\text{O}}$  radical additions to  $\text{C}_2\text{H}_2/\text{C}_2\text{H}_4$ .

| $\Delta Q_{\text{HR}}(\text{MAX})$ | <b>B2PLYP-D3</b>        |                           |                     | <b>B3LYP</b>            |                           |                     | <b>M06-2X</b>           |                           |                     | <b><math>\omega</math>B97X-D</b> |                           |                     |
|------------------------------------|-------------------------|---------------------------|---------------------|-------------------------|---------------------------|---------------------|-------------------------|---------------------------|---------------------|----------------------------------|---------------------------|---------------------|
|                                    | <b>6-<br/>31+G(d,p)</b> | <b>6-<br/>311++G(d,p)</b> | <b>cc-<br/>pVTZ</b> | <b>6-<br/>31+G(d,p)</b> | <b>6-<br/>311++G(d,p)</b> | <b>cc-<br/>pVTZ</b> | <b>6-<br/>31+G(d,p)</b> | <b>6-<br/>311++G(d,p)</b> | <b>cc-<br/>pVTZ</b> | <b>6-<br/>31+G(d,p)</b>          | <b>6-<br/>311++G(d,p)</b> | <b>cc-<br/>pVTZ</b> |
| <b>TS1</b>                         | 0.25                    | -0.28                     | 1.11                | 0.68                    | 0.35                      | -0.40               | 0.89                    | 0.28                      | -0.18               | 0.98                             | -0.50                     | 0.59                |
| <b>TS2</b>                         | -4.17                   | -4.10                     | -2.87               | 0.44                    | -0.31                     | 1.38                | -6.30                   | -6.42                     | -5.19               | -3.29                            | -3.37                     | -1.08               |
| <b>TS9</b>                         | -4.58                   | -6.47                     | -4.10               | -5.80                   | -4.79                     | -9.05               | -3.88                   | -0.13                     | -6.88               | -0.61                            | -1.15                     | -1.79               |
| <b>TS10</b>                        | 23.38                   | 21.55                     | 11.74               | 36.79                   | 32.43                     | 33.71               | -6.76                   | -8.48                     | -8.25               | 12.85                            | 8.47                      | 12.58               |
| <b>TS17</b>                        | 9.57                    | 30.78                     | -16.55              | 9.94                    | 24.52                     | 13.61               | 40.57                   | 29.52                     | -5.82               | -14.23                           | 17.16                     | 8.60                |
| <b>TS18</b>                        | -5.19                   | -6.22                     | -4.21               | 13.08                   | 8.82                      | 9.67                | -13.18                  | -13.95                    | -13.15              | -5.14                            | -6.83                     | -4.41               |
| <b>TS25</b>                        | 4.69                    | -3.34                     | -1.44               | 13.06                   | -0.97                     | 12.12               | -6.51                   | -14.90                    | -5.69               | 6.05                             | -4.71                     | 6.39                |
| <b>TS26</b>                        | -5.45                   | -7.26                     | -4.36               | 0.37                    | -2.25                     | -1.33               | -4.82                   | -5.79                     | -3.36               | -2.13                            | -4.47                     | -2.49               |
